# Supplementary material
Source: PubMed Central journal article supplement (PMC7744321)
Supplement: NIHMS1622927-supplement-Supplemental_Table_1.pdf [file NIHMS1622927-supplement-Supplemental_Table_1.pdf]

**Supplemental Table 1.** Association of American Urologic Association Symptom Index storage and voiding subscore\* cross-classification with frailty phenotype among 5979 men enrolled in MrOS.

| <b>Multivariable Multinomial Odds Ratio (95% Confidence Interval)†</b> |                   |                   |                   |
|------------------------------------------------------------------------|-------------------|-------------------|-------------------|
| <b>Intermediate vs Robust</b>                                          |                   |                   |                   |
| <b>AUASI voiding subscore</b>                                          |                   |                   |                   |
| <b>AUASI storage subscore</b>                                          | 0-1               | 2-4               | 5-20              |
| 0-3                                                                    | 1.00              | 0.96 (0.79, 1.17) | 0.89 (0.67, 1.18) |
| 4-6                                                                    | 0.97 (0.79, 1.18) | 1.03 (0.84, 1.26) | 1.10 (0.91, 1.33) |
| 7-15                                                                   | 1.38 (0.99, 1.92) | 1.25 (0.96, 1.62) | 1.18 (0.99, 1.41) |
| <b>Frail vs Robust</b>                                                 |                   |                   |                   |
| <b>AUASI voiding subscore</b>                                          |                   |                   |                   |
| <b>AUASI storage subscore</b>                                          | 0-1               | 2-4               | 5-20              |
| 0-3                                                                    | 1.00              | 1.06 (0.72, 1.56) | 0.95 (0.55, 1.64) |
| 4-6                                                                    | 1.14 (0.77, 1.69) | 1.05 (0.71, 1.56) | 1.35 (0.95, 1.93) |
| 7-15                                                                   | 1.88 (1.07, 3.28) | 1.61 (1.03, 2.53) | 2.20 (1.64, 2.96) |

AUASI American Urologic Association Symptom Index

\* AUASI score range is 0 to 35 and equals the sum of 2 validated subscores based on symptom type: storage (urgency, frequency, nocturia) and voiding (intermittency, weak stream, straining, incomplete emptying). Higher score indicates more frequent symptoms. AUASI subscores categorized into approximately equal thirds (tertiles) of the subscore distribution.

† Multivariable multinomial regression model adjusted for study site, age, and self-reported history of cardiovascular disease (myocardial infarction or angina), diabetes, congestive heart failure, chronic obstructive pulmonary disease, or hypertension.
